# Supplementary material for: Graphene-coated mesoporous Co3O4 fibers as an efficient anode material for Li-ion batteries
Source: Royal Society of Chemistry journal article supplement (doi:10.1039/c6ra15404b), 2016-01-01
Supplement: c6ra15404b1.pdf [file c6ra15404b1.pdf]

## **Graphene-coating mesoporous Co<sub>3</sub>O<sub>4</sub> fibers as an efficient anode material for Li-ion batteries**

Genlong Qu,<sup>a</sup> Hongbo Geng,<sup>a</sup> Danhua Ge,<sup>a</sup> Junwei Zheng,<sup>b</sup> Hongwei Gu<sup>a\*</sup>

*<sup>a</sup>Key Laboratory of Organic Synthesis of Jiangsu Province, College of Chemistry, Chemical Engineering and Materials Science & Collaborative Innovation Center of Suzhou Nano Science and Technology, Soochow University, Suzhou, 215123, P. R. China. Tel/fax:(86)-512-65880905; Email: hongwei@suda.edu.cn.*

*<sup>b</sup>College of Physics, Optoelectronics and Energy, Soochow University, Suzhou, 215006, China.*

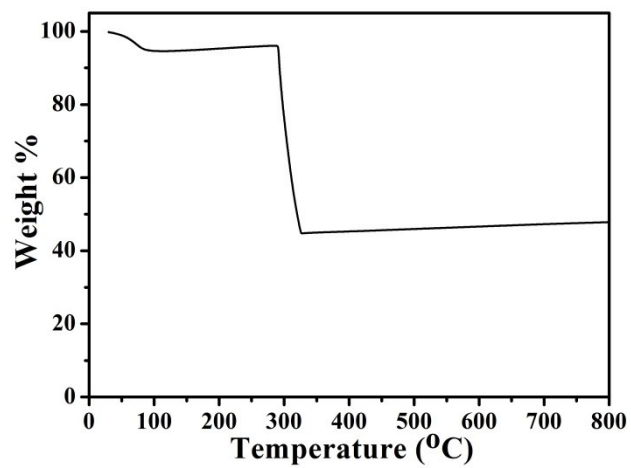

Figure S1. The TGA curve of the synthesized Co-NTA fibers sample.

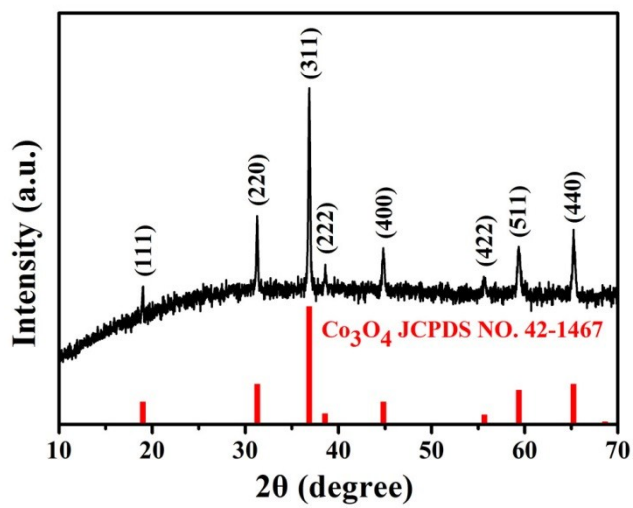

Figure S2. The XRD pattern of Co<sub>3</sub>O<sub>4</sub> fibers.

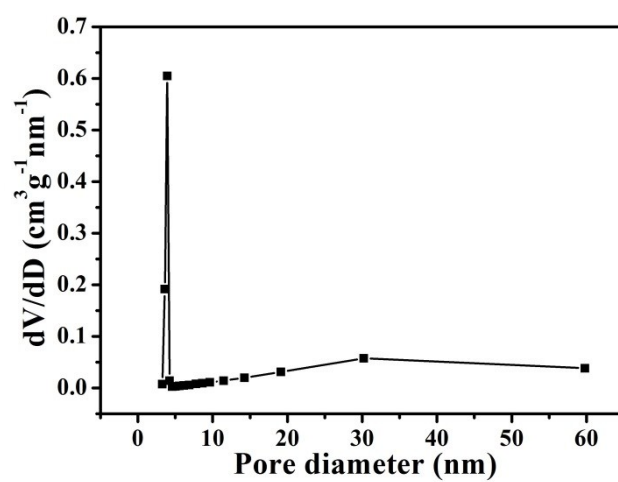

Figure S3. The pore-size distribution of  $\text{Co}_3\text{O}_4@\text{G}$  fibers.

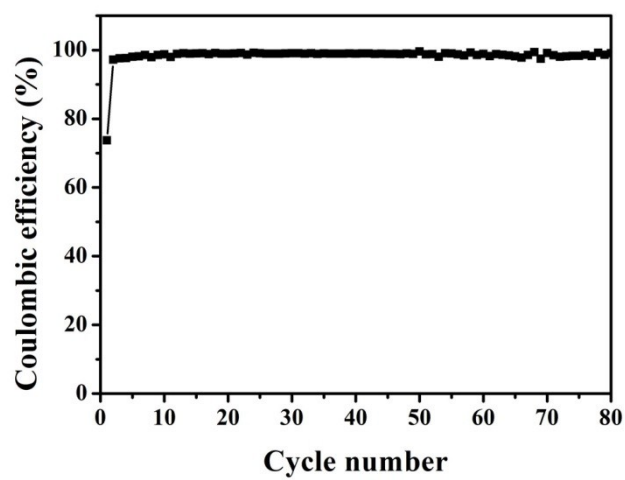

Figure S4. The coulombic efficiency of  $\text{Co}_3\text{O}_4@\text{G}$  electrode.

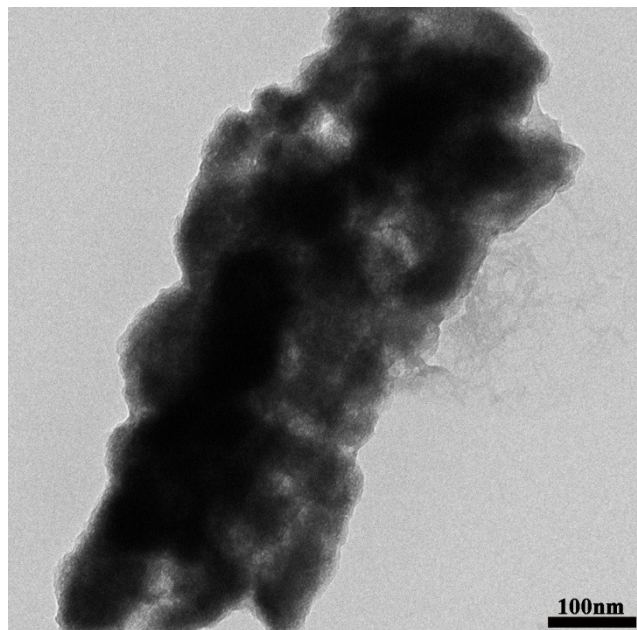

Figure S5. TEM image of  $\text{Co}_3\text{O}_4@\text{G}$  nanocomposites electrode after 80 cycles.
